# Supplementary material for: One-pot synthesis of silica core–shell particles with double shells and different pore orientations from their nonporous counterparts
Source: Royal Society of Chemistry journal article supplement (doi:10.1039/c2jm31090b), 2012-01-01
Supplement: c2jm31090b.pdf [file c2jm31090b.pdf]

## Electronic Supporting Information

### **One-Pot Synthesis of Silica Core-Shell Particles with Double Shells and Different Pore Orientations from their Nonporous Counterparts**

Hanjiang Dong and John D. Brennan\*

Department of Chemistry & Chemical Biology, McMaster University, 1280 Main St. West,  
Hamilton, ON, L8S 4M1

\*Author to whom correspondence should be addressed

Tel: (905) 525-9140 (ext. 27033)

Fax: (905) 527-9950

e-mail: [brennanj@mcmaster.ca](mailto:brennanj@mcmaster.ca)

Internet: <http://www.chemistry.mcmaster.ca/faculty/brennan>

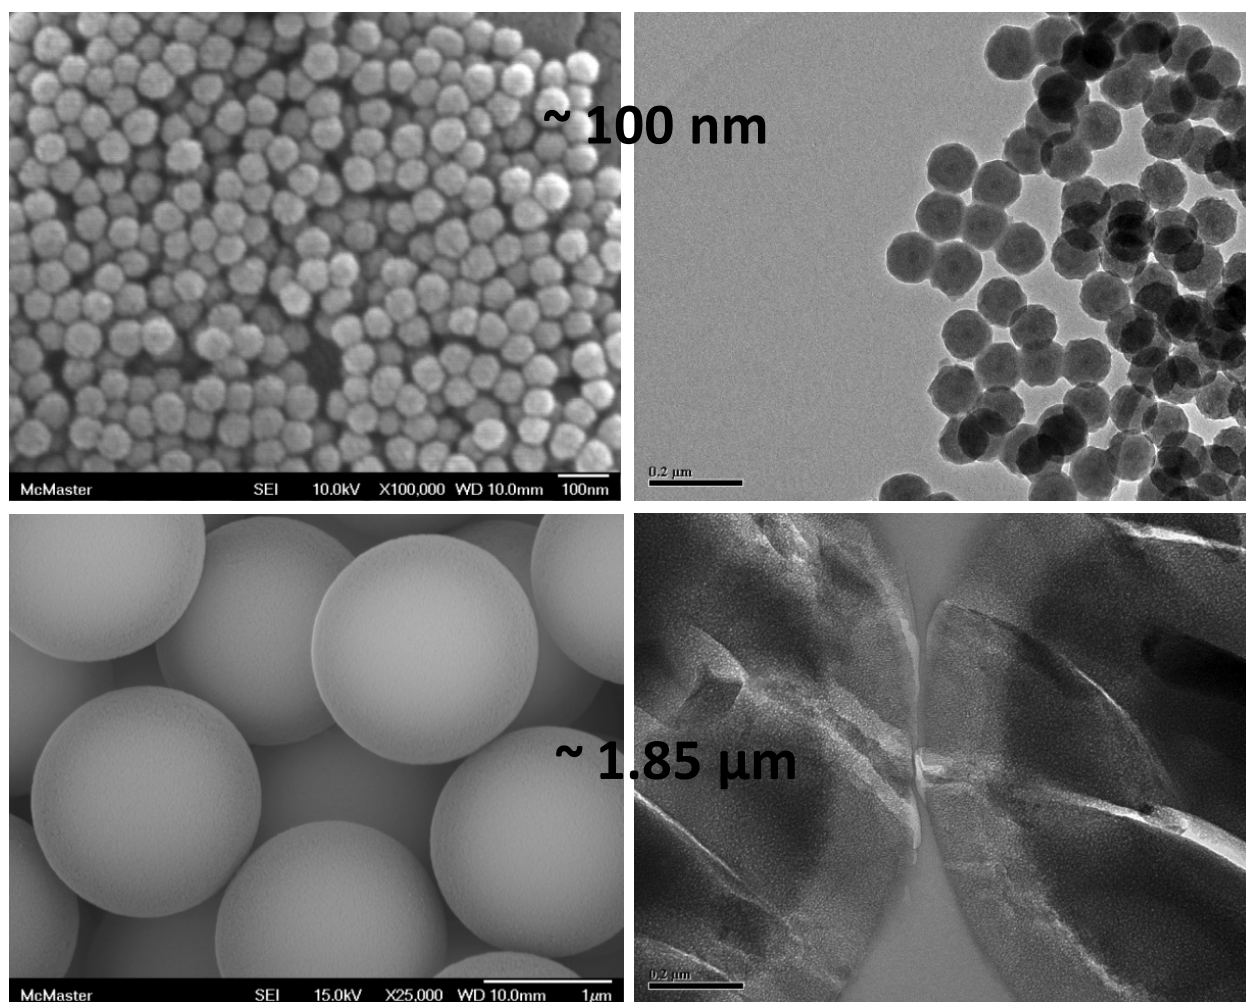

**Figure S1.** SEM and TEM images of small ( $\sim 100$  nm) and large ( $\sim 1.85$   $\mu\text{m}$ ) CSPs, demonstrating the ability to control particle sizes over a broad range.

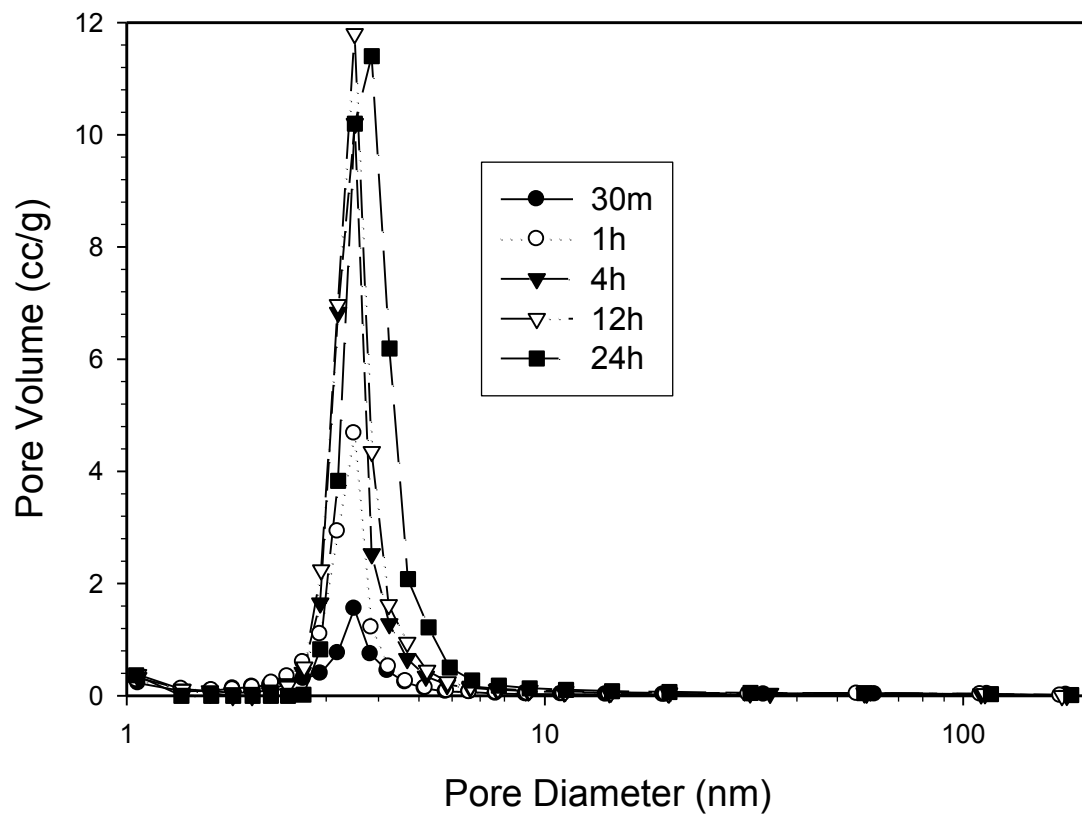

**Figure S2.** Pore size distribution of CSPs derived from the desorption branch of isotherms.

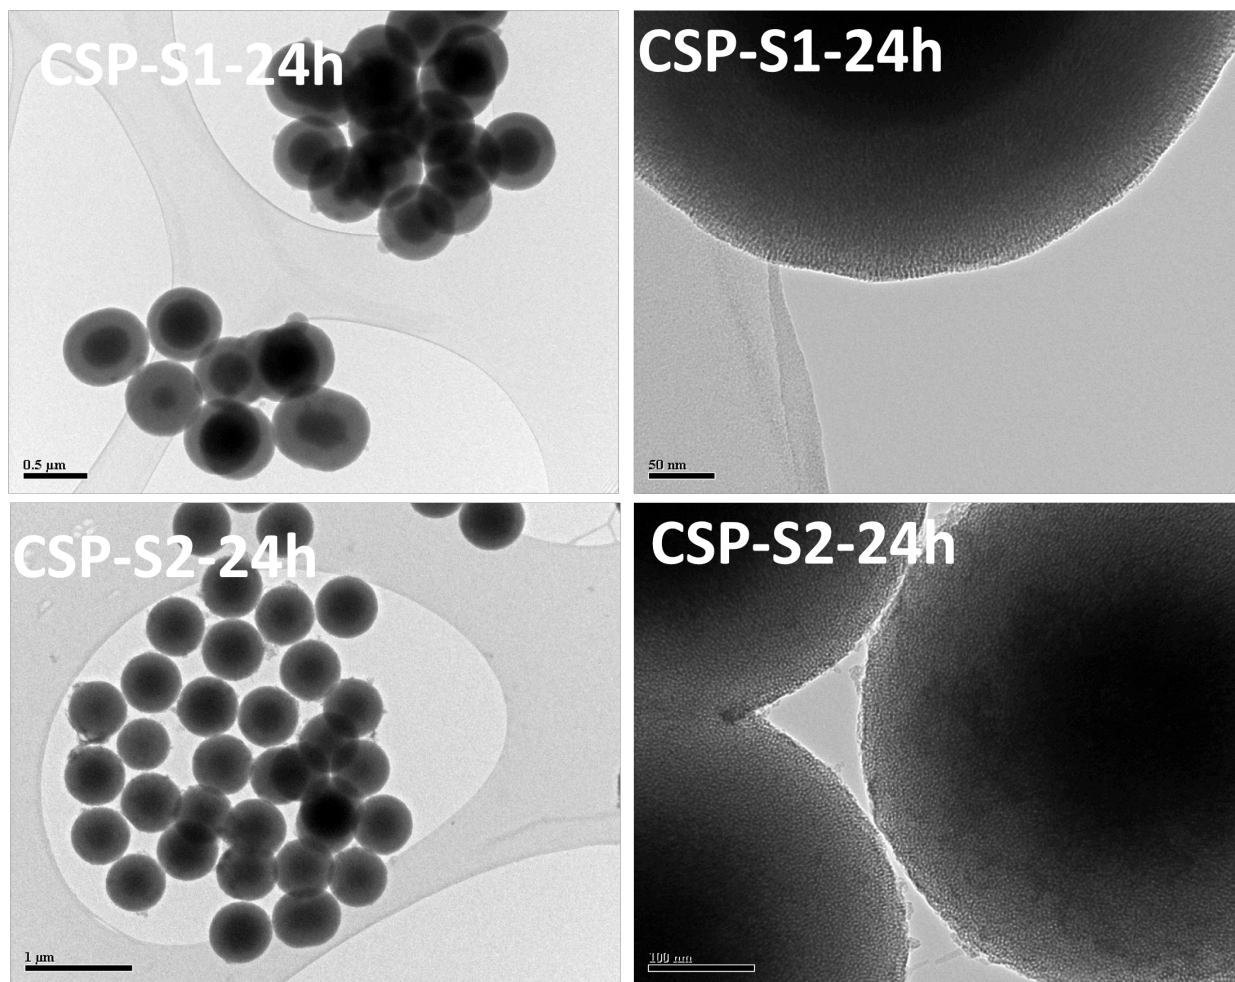

**Figure S3.** TEM images of silica core-shell particles prepared by using silica/CTAC/ $\text{NH}_4\text{OH}$  system reacted for 24 hrs at  $100^\circ\text{C}$  and  $60^\circ\text{C}$ , respectively.

Figure S3 shows TEM images of CSP-S1-24h- $100^\circ\text{C}$  and CSP-S2-24h- $60^\circ\text{C}$ , which were obtained in using the silica/CTAC/ $\text{NH}_4\text{OH}$  system (no tridecane and  $\text{NH}_4\text{F}$ ) after a 24 h reaction time but at different temperatures of  $100^\circ\text{C}$  and  $60^\circ\text{C}$ , respectively. Compared to Figure 1 in the paper, several differences can be clearly observed from Figure S3 when the formulation without adding  $\text{NH}_4\text{F}$  and tridecane was used to prepare core-shell particles. Firstly, the core-shell particles have non-uniform shell thicknesses. Secondly, these particles have very thin shells at high temperature (CSP-S1-24h- $100^\circ\text{C}$ ) and almost no shells with radial pores at low temperature (CSP-S2-24h- $60^\circ\text{C}$ ). Thirdly, particle sizes remain similar when no radial shells are

formed and increase in size by approximately 9% when only thin shells with radial pores are formed. This is in contrast with the particles discussed in the text, whose diameters increase more than 40 % after a 24 h reaction time (CSP-24h). Finally, secondary nucleation is more difficult to avoid.

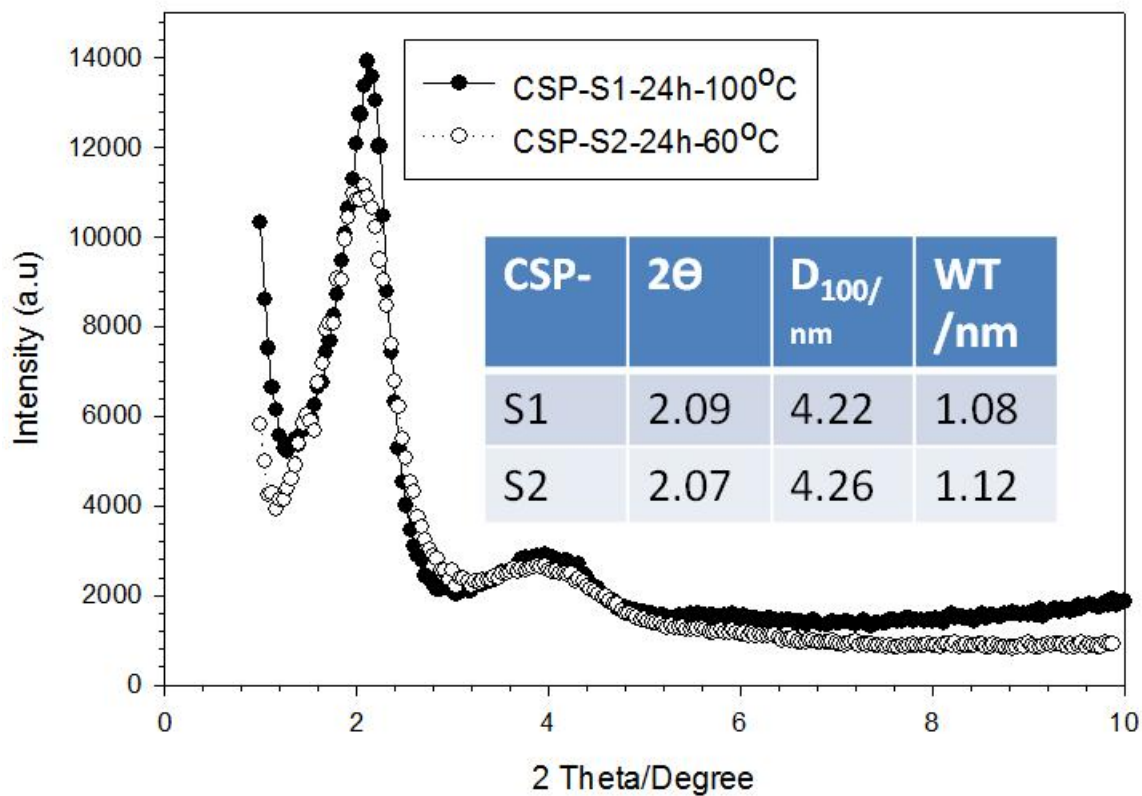

**Figure S4.** Powder XRD patterns of CSP-S1-24h-100°C and CSP-S2-24h-60°C.

Figure S4 shows that the absence of the swelling chemical tridecane clearly resulted in a much stronger, though still overlapped and broad, diffraction peak (diffraction pattern from a combination of (110) and (200) planes) and a narrower and stronger peak (from (100) plane), indicating the presence of a more ordered hexagonal mesostructure in CSP-S1-24h-100°C and CSP-S2-24h-60°C compared to CSP-24h. From the inset table, one can also observe that CSP-S1-24h-100°C and CSP-S2-24h-60°C have similar but larger max.  $2\theta$  values than CSP-24h. However, all these samples (CSP-S1-24h-100°C, CSP-S2-24h-60°C, and CSP-24h) have a very similar wall thickness. These results strongly suggest that the warmhole-like pores have a pore ordering that is similar to that of radially oriented pores.
